# Supplementary material for: An Integrative Phenotype–Genotype Approach Using Phenotypic Characteristics from the UAE National Diabetes Study Identifies HSD17B12 as a Candidate Gene for Obesity and Type 2 Diabetes
Source: MDPI journal article supplement (doi:10.3390/genes11040461), 2020-04-23
Supplement: s1 [file s1]

**Supplementary Figure 1.** Screenshots of examples SNPs in the genes identified generated by targeted DNA next-generation sequencing in Emirati diabetic patients. Mutations generated using vcftools and visualized using IGV.

[illegible]

The screenshot displays the IGV (Integrative Genomics Viewer) interface. At the top, a search bar contains the text "chr11:11,400,000-11,400,100". Below the search bar, a track labeled "chr11:11,400,000-11,400,100" shows a genomic region with a scale bar indicating positions from 11,400,000 to 11,400,100. The main panel shows a coverage track with a peak at approximately 11,400,050, followed by a track of individual sequencing reads. The reads are color-coded by base call (A, C, G, T) and show some mismatches from the reference. The bottom track, labeled "Annotations", displays gene models and other genomic features. The interface includes a sidebar on the left with tabs for "Genomes", "Tracks", "Regions", "Tools", "GenomeSpace", "Help", and "Interact".

The screenshot displays the JBrowse genome browser interface. At the top, a navigation bar includes a search bar, a zoom control, and a list of tracks. The main view shows a genomic track for the human genome, specifically the region 11p13.1-p13.2. The track is divided into several sections: 'Genes' (showing genes like PLEKHA7, PLEKHA7-AS1, and PLEKHA7-AS2), 'Transcripts' (showing transcripts for these genes), 'Variants' (showing SNPs and other variants), and 'Annotations' (showing various genomic features). The bottom track shows the 'Sequence' (raw sequencing data) and 'Paralogs' (showing paralogous regions). The interface includes a search bar at the top left, a zoom control at the top right, and a list of tracks on the left side.

[illegible]

**Supplementary Figure 2; List of the location and functional consequences of rs4573668 as predicted by SNPnexus tool.**

| Variation ID | Chromosome | Position | Variant | Strand | Symbol     | Gene            | Transcript      | Predicted Function  | CDNA Position | CDS Position | AA Position | AA Change | Detail | Splice Distance | Proteins                                                                                                                                                                                                                                                                                         |
|--------------|------------|----------|---------|--------|------------|-----------------|-----------------|---------------------|---------------|--------------|-------------|-----------|--------|-----------------|--------------------------------------------------------------------------------------------------------------------------------------------------------------------------------------------------------------------------------------------------------------------------------------------------|
| rs4573668    | chr11      | 43681065 | G/C     | 1      | HS017812   | ENSG00000149084 | ENST0000037401  | Intronic            | None          | None         | None        | None      | None   | 78              | None                                                                                                                                                                                                                                                                                             |
| rs4573668    | chr11      | 43681065 | G/C     | 1      | HS017812   | ENSG00000149084 | ENST0000031185  | Intronic            | None          | None         | None        | None      | None   | 78              | None                                                                                                                                                                                                                                                                                             |
| rs4573668    | chr11      | 43681065 | G/C     | 1      | HS017812   | ENSG00000149084 | ENST0000036007  | Intronic            | None          | None         | None        | None      | None   | 78              | None                                                                                                                                                                                                                                                                                             |
| rs4573668    | chr11      | 43681065 | G/C     | 1      | AC068205.2 | ENSG00000283341 | ENST0000032864  | non-coding intronic | None          | None         | None        | None      | None   | 40031           | None                                                                                                                                                                                                                                                                                             |
| rs4573668    | chr11      | 43681065 | G/C     | 1      | AC068205.2 | ENSG00000283341 | ENST00000329261 | non-coding intronic | None          | None         | None        | None      | None   | 7926            | None                                                                                                                                                                                                                                                                                             |
| rs4573668    | chr11      | 43681065 | G/C     | 1      | HS017812   | ENSG00000149084 | ENST0000038034  | Supstream           | None          | None         | None        | None      | None   | None            | None                                                                                                                                                                                                                                                                                             |
| rs4573668    | chr11      | 43681065 | G/C     | 1      | HS017812   | ENSG00000149084 | ENST00000327433 | Intronic            | None          | None         | None        | None      | None   | 261             | None                                                                                                                                                                                                                                                                                             |
| rs4573668    | chr11      | 43681065 | G/C     | 1      | HS017812   | ENSG00000149084 | ENST0000036722  | coding              | 271           | 238          | 80          | V>L       | nonsyn | None            | ME5AIPAAAGFLWV<br>VGAGTVAYLALRIS<br>YSUFTAIRVWGVG<br>NEAGVGPGLGEW<br>AGESDAAPRPRSR<br>GGPDQAWAVMTS<br>SGVCSWSPSPQLS<br>SPSGSCAPRAPGS<br>LGCLLA*)MESAL<br>PAAGFLWVGAGT<br>VAYLAIRISYSLFTA<br>LRVWGVGNAGV<br>GPGLGEWAGESDA<br>APIPRSRGGPDQA<br>WAVMTSSGLCSW<br>PSPQLSSPSGSCA<br>PRAPPGSLGCLLA<br>* |
| rs4573668    | chr11      | 43681065 | G/C     | 1      | HS017812   | ENSG00000149084 | ENST00000278353 | Intronic            | None          | None         | None        | None      | None   | 78              | None                                                                                                                                                                                                                                                                                             |
| rs4573668    | chr11      | 43681065 | G/C     | 1      | HS017812   | ENSG00000149084 | ENST00000395700 | Intronic            | None          | None         | None        | None      | None   | 78              | None                                                                                                                                                                                                                                                                                             |

**Supplementary Table 1:** Enriched Ontology Clusters of the identified 34 genes associated with the UAEDIA-phenotypes.

| Pathway Id    | Pathway Description            | Parent Description    | Genes                 | Gene Count |
|---------------|--------------------------------|-----------------------|-----------------------|------------|
| R-HSA-1266738 | Developmental Biology          | Developmental Biology | HNF1B,FES,FOXO3,HOXA3 | 4          |
| R-HSA-162582  | Signal Transduction            | Signal Transduction   | FES,MADD,FOXO3,PRC1   | 4          |
| R-HSA-1430728 | Metabolism                     | Metabolism            | HSD17B12,STARD3,NAT2  | 3          |
| R-HSA-1433557 | Signaling by SCF-KIT           | Signal Transduction   | FES,FOXO3             | 2          |
| R-HSA-196071  | Metabolism of steroid hormones | Metabolism            | HSD17B12,STARD3       | 2          |
| R-HSA-556833  | Metabolism of lipids           | Metabolism            | HSD17B12,STARD3       | 2          |
| R-HSA-8957322 | Metabolism of steroids         | Metabolism            | HSD17B12,STARD3       | 2          |

**Supplementary Table 2.** List of the 4 identified SNPs in HSD17B12 gene in two Emirati diabetic patients, with their location and significance in gene expression.

| ID                   | SNP                        | Chromosome | Position | Overlapped Gene          | Annotation                                  |
|----------------------|----------------------------|------------|----------|--------------------------|---------------------------------------------|
| chr11:43681065:G/C:1 | <a href="#">rs4573668</a>  | chr11      | 43681065 | <a href="#">HSD17B12</a> | intronic,coding nonsyn,5upstream            |
| chr11:43750999:A/G:1 | <a href="#">rs12801203</a> | chr11      | 43750999 | <a href="#">HSD17B12</a> | intronic,non-coding intronic                |
| chr11:43754184:A/G:1 | <a href="#">rs4643069</a>  | chr11      | 43754184 | <a href="#">HSD17B12</a> | intronic,non-coding<br>intronic,3downstream |
| chr11:43830941:T/C:1 | <a href="#">rs6485471</a>  | chr11      | 43830941 | <a href="#">HSD17B12</a> | intronic,non-coding intronic,non-coding     |
